# Supplementary material for: Determination of quetiapine and its metabolites in plasma by field-enhanced sample stacking
Source: PubMed Central journal article supplement — J Food Drug Anal. 2021 Dec 15;29(4):709–16. doi: 10.38212/2224-6614.3378 (PMC9931024; doi:10.38212/2224-6614.3378), 2021-12-15
Supplement: JFDA-29-709_FiguresS1-S8_TablesS1-S4.pdf [file JFDA-29-709_FiguresS1-S8_TablesS1-S4.pdf]

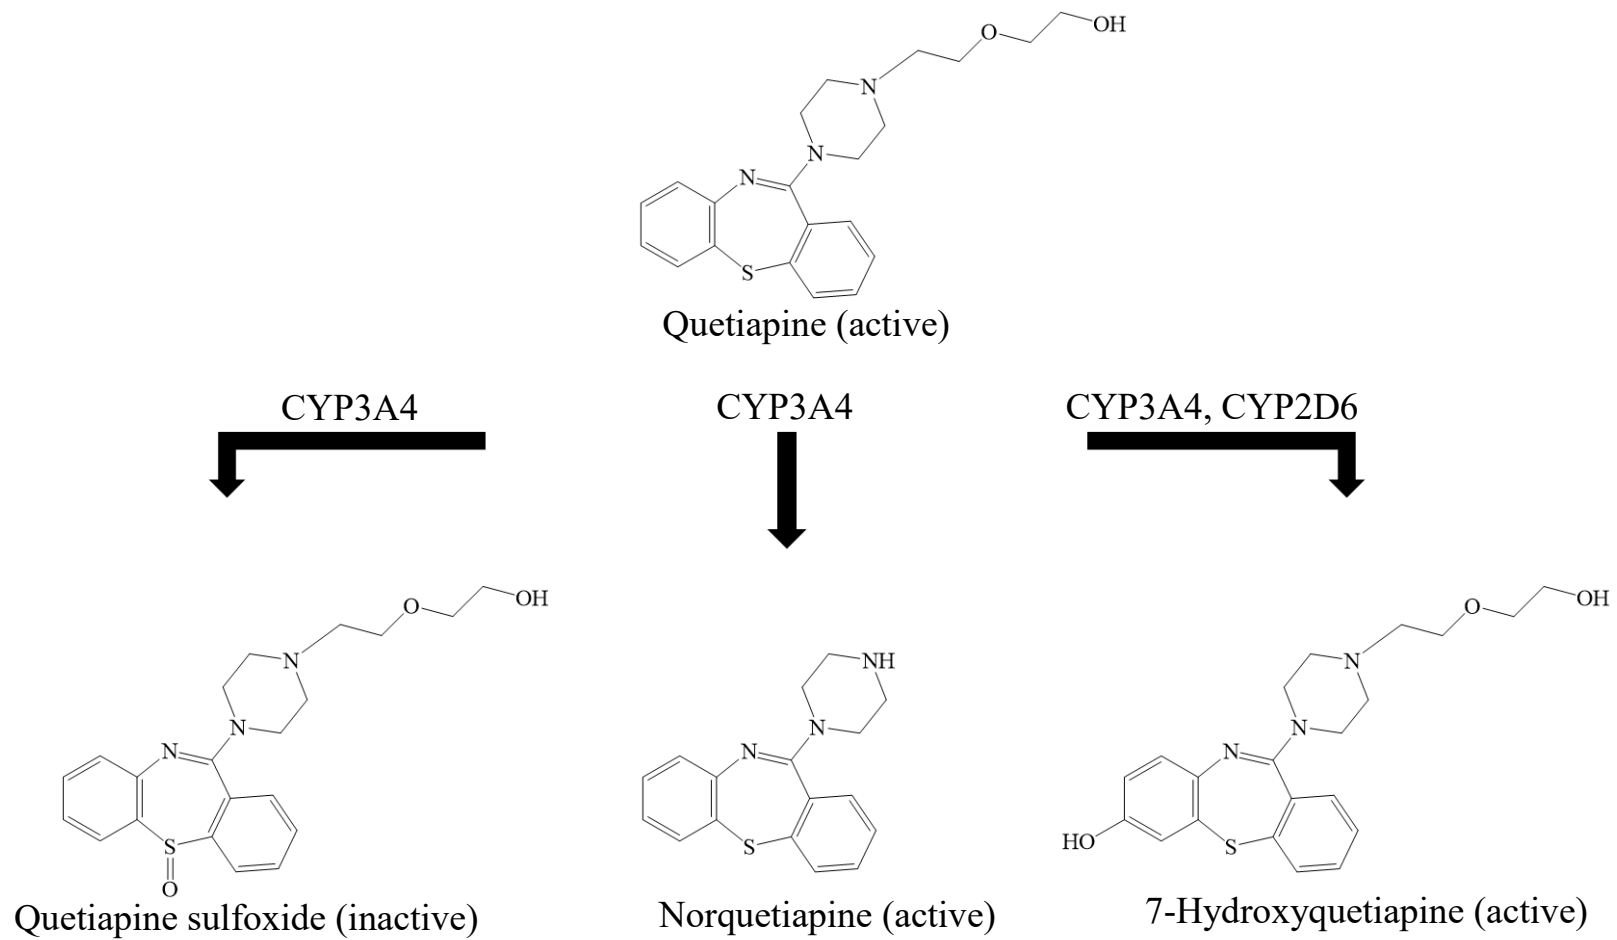

Fig. S1. Metabolic pathways of Quetiapine.

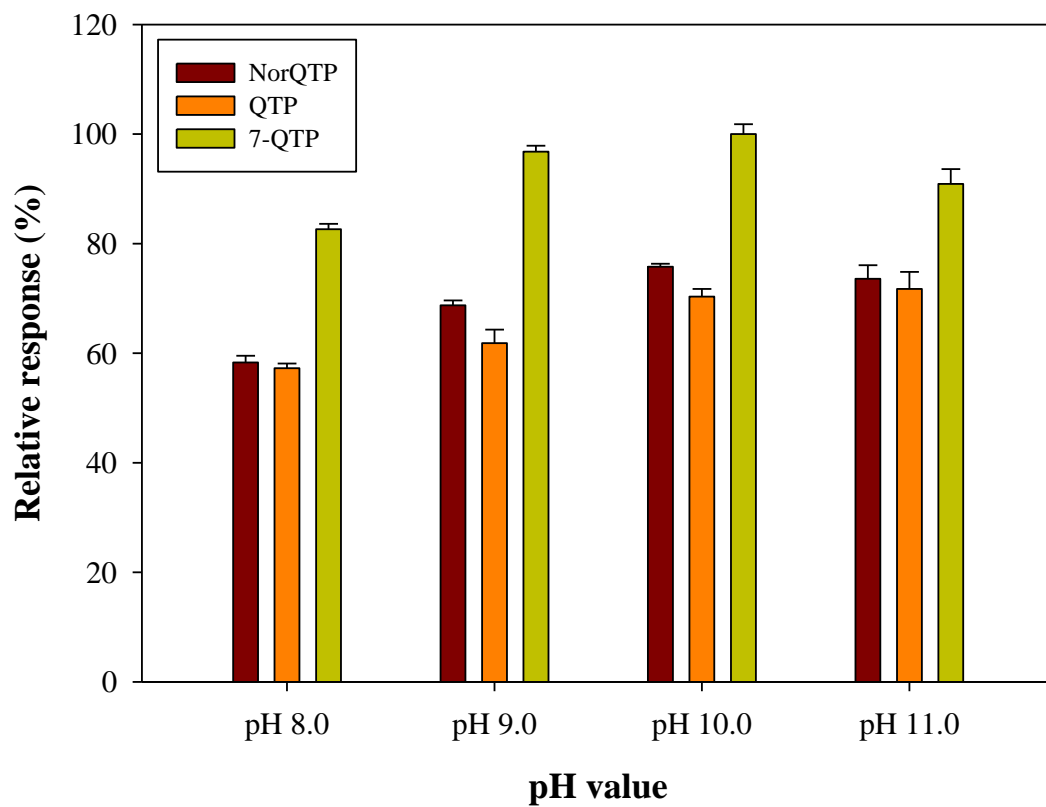

Fig. S2. Effect of different pH values of plasma in LLE procedure. Analytes concentrations: NorQTP: 50 ng/mL, QTP: 50 ng/mL, 7-QTP: 50 ng/mL. Other conditions were shown in Fig. 2.

(a) pH 3.0

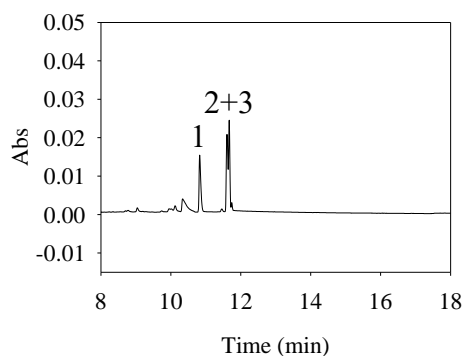

(b) pH 3.5

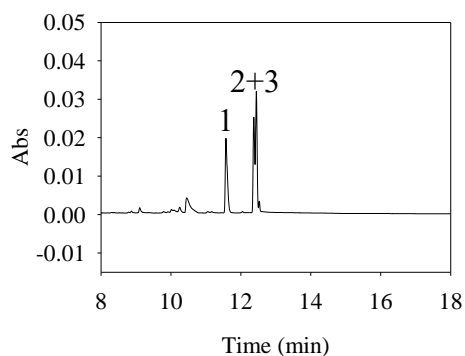

(c) pH 4.0

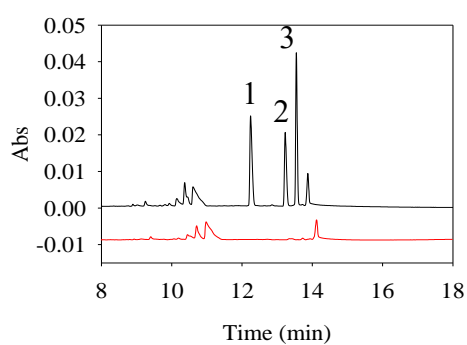

(d) pH 5.0

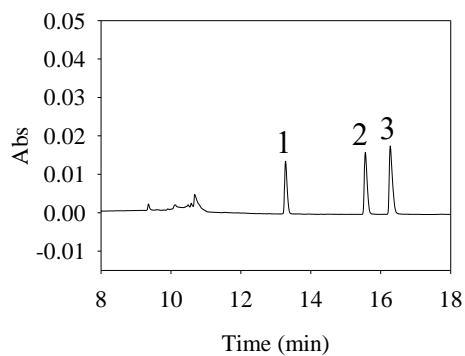

Fig. S3. Electropherograms of different pH values of phosphate buffer in BGS. (a) pH 3.0, (b) pH 3.5, (c) pH 4.0, (d) pH 5.0. Analytes concentrations: peak 1: NorQTP (50 ng/mL), peak 2: QTP (50 ng/mL), peak 3: 7-QTP (50 ng/mL). Other conditions were shown in Fig. 2.

(a) 0%

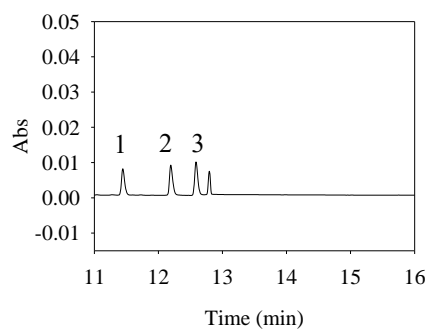

(b) 0.001%

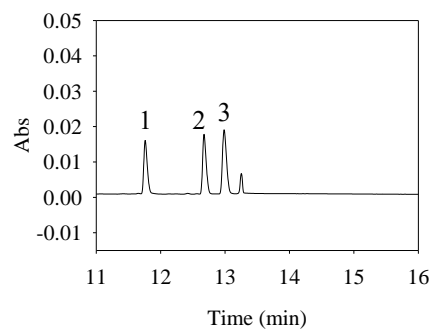

(c) 0.005%

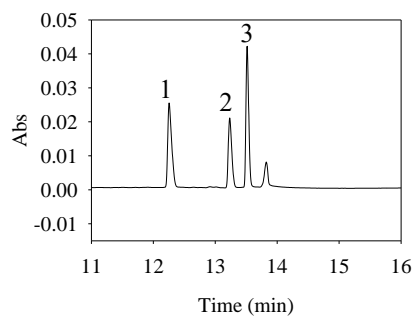

(d) 0.01%

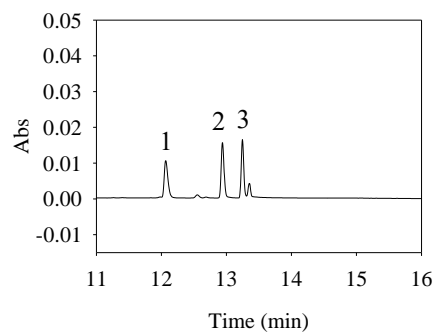

Fig. S4. Electropherograms of different PVP proportions in BGS. (a) 0%, (b) 0.001%, (c) 0.005%, (d) 0.01% (w/v). Analytes concentrations: peak 1: NorQTP (50 ng/mL), peak 2: QTP (50 ng/mL), peak 3: 7-QTP (50 ng/mL). Other conditions were shown in Fig. 2.

(a) without plug

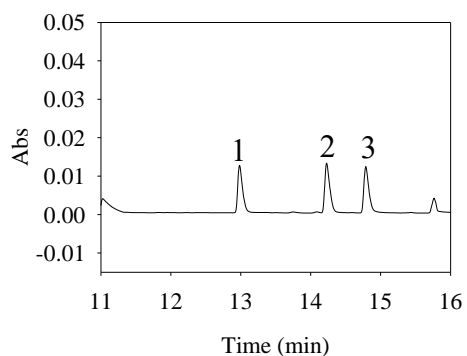

(b) water

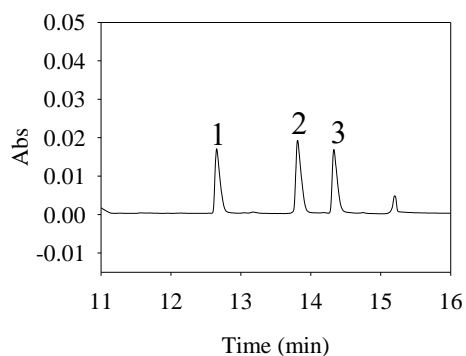

(c) acetonitrile

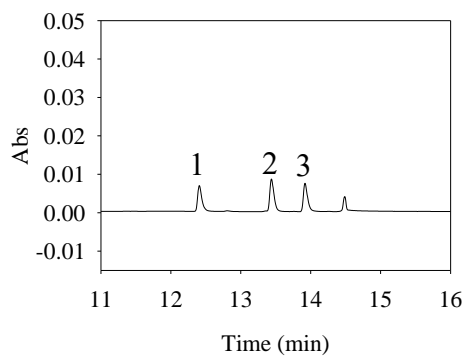

(d) methanol

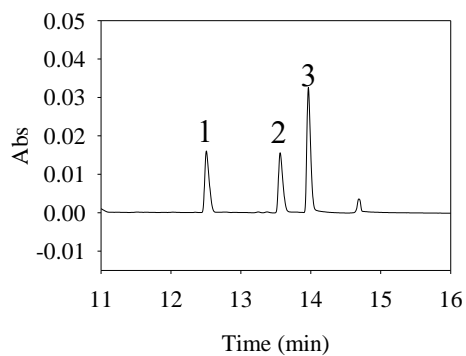

Fig. S5. Electropherograms of different kinds of plug. (a) without plug, (b) water, (c) acetonitrile, (d) methanol. Analytes concentrations: peak 1: NorQTP (50 ng/mL), peak 2: QTP (50 ng/mL), peak 3: 7-QTP (50 ng/mL). Other conditions were shown in Fig. 2.

(a) 50 s

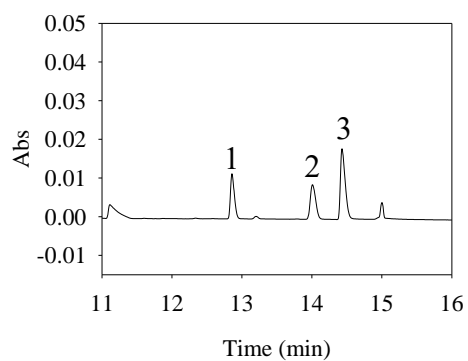

(b) 60 s

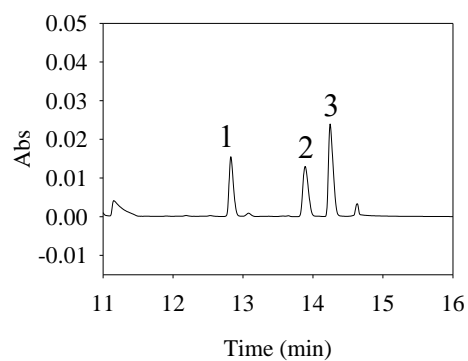

(c) 70 s

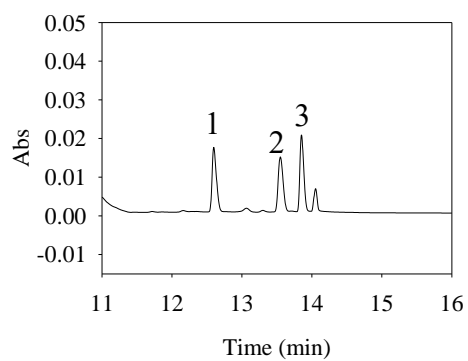

(d) 80 s

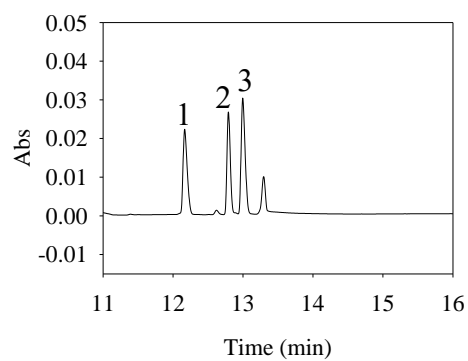

Fig. S6. Electropherograms of different durations of sample injection. (a) 50 s, (b) 60 s, (c) 70 s, (d) 80 s by +10 kV. Analytes concentrations: peak 1: NorQTP (50 ng/mL), peak 2: QTP (50 ng/mL), peak 3: 7-QTP (50 ng/mL). Other conditions were shown in Fig. 2.

(a) CZE

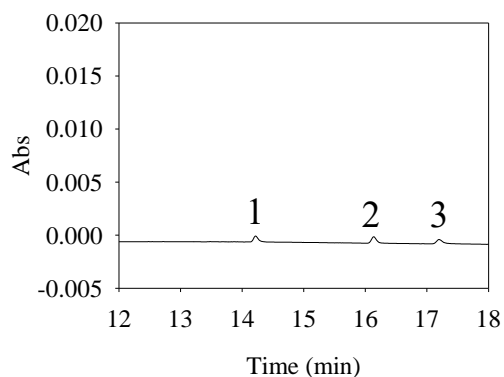

(b) FESS

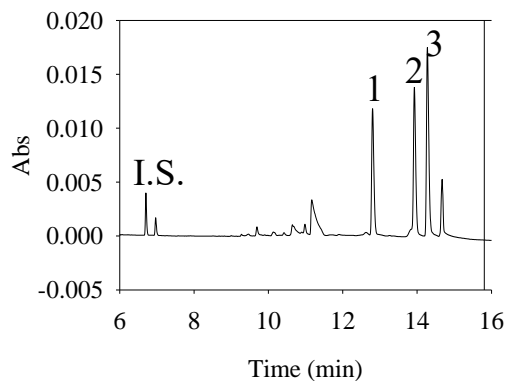

Fig. S7. Electropherograms of QTP, NorQTP, 7-QTP by (a) CZE, (b) FESS. Analytes concentrations: CZE: peak 1: NorQTP (1  $\mu\text{g}/\text{mL}$ ), peak 2: QTP (1  $\mu\text{g}/\text{mL}$ ), peak 3: 7-QTP (1  $\mu\text{g}/\text{mL}$ ); FESS: IS: 4-aminopyridine (20  $\text{ng}/\text{mL}$ ), peak 1: NorQTP (50  $\text{ng}/\text{mL}$ ), peak 2: QTP (50  $\text{ng}/\text{mL}$ ), peak 3: 7-QTP (50  $\text{ng}/\text{mL}$ ). CZE condition: sample injection: 0.5 psi, 10 s; CE condition: separation buffer, 120 mM phosphate (pH 4.0) containing 0.005% (w/v) PVP and 40% (v/v) methanol; methanol plug: 0.3 psi, 6 s; separation voltage, +26 kV; detection wavelength, 214 nm; temperature: 20°C.

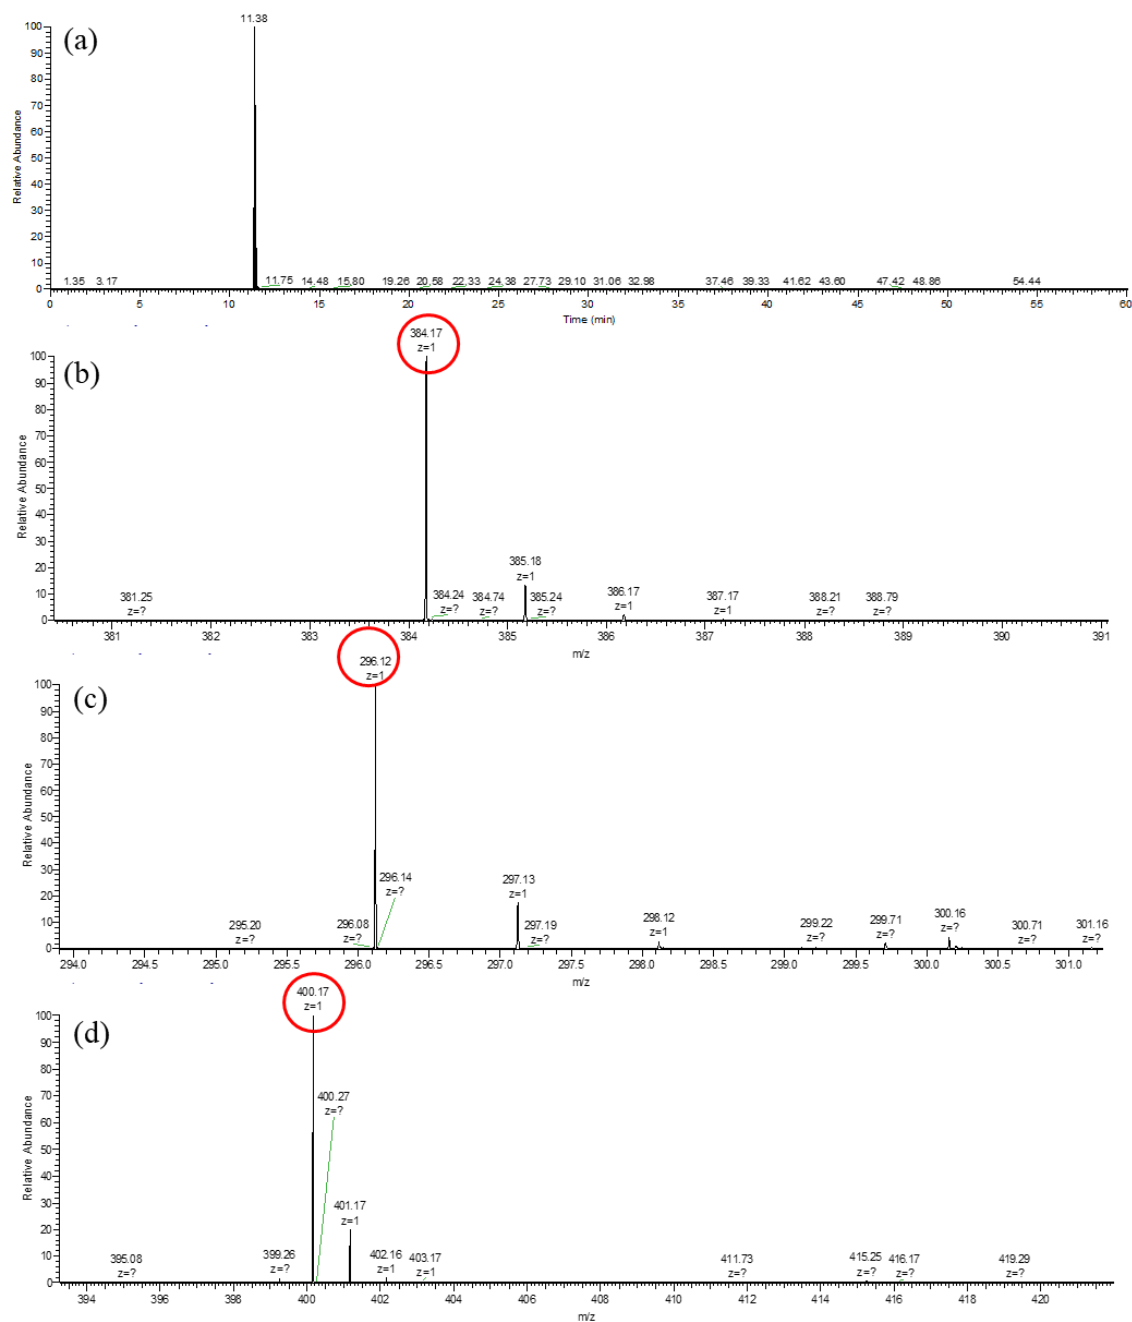

Fig. S8. The spectra of QTP in plasma sample 1 from 1 hour after dosing. (a) LC, (b) MS. Peak:  $[M+H]^+$ : QTP ( $m/z$  384.17), (c) MS. Peak:  $[M+H]^+$ : NorQTP ( $m/z$  296.12), (d) MS. Peak:  $[M+H]^+$ : 7-QTP ( $m/z$  400.16)



Table S1. The extraction recoveries (%) of different extraction solvents.

| Extraction solvents             | QTP  | Nor-QTP | 7-QTP |
|---------------------------------|------|---------|-------|
| <i>tert</i> -butyl methyl ether | 55.3 | 20.6    | 52.9  |
| dichloromethane                 | 59.7 | 26.7    | 47.9  |
| chloroform                      | 51.1 | 15.2    | 32.1  |
| ethyl acetate                   | 30.3 | 7.32    | 34.4  |

Table S2. The extraction recoveries (%) of different *tert*-butyl methyl ether volumes.

| <i>tert</i> -butyl methyl ether<br>volumes | QTP  | Nor-QTP | 7-QTP |
|--------------------------------------------|------|---------|-------|
| 500 $\mu$ L                                | 37.5 | 11.7    | 31.5  |
| 750 $\mu$ L                                | 43.0 | 18.6    | 41.1  |
| 1000 $\mu$ L                               | 55.3 | 20.6    | 52.9  |
| 1250 $\mu$ L                               | 28.8 | 8.9     | 38.0  |

Table S3. Linear range and LODs for CE system with FESS method.

|        | Linear range (ng/mL) | <sup>a</sup> LODs (ng/mL) |
|--------|----------------------|---------------------------|
| QTP    | 3-120                | 0.25                      |
| NorQTP | 3-120                | 0.50                      |
| 7-QTP  | 3-120                | 1.00                      |

<sup>a</sup>LODs: limit of detection (S/N=3)

Table S4. Regression analysis for determination of QTP and its metabolites in intra-day (n=3) and inter-day (n=5).

| Analytes        | Regression equation                        | Correlation coefficient (r) |
|-----------------|--------------------------------------------|-----------------------------|
| Intraday (n=3)  |                                            |                             |
| QTP             | $y=(0.0337\pm 0.0045)x+(0.0460\pm 0.0478)$ | 0.999                       |
| NorQTP          | $y=(0.0531\pm 0.0041)x+(0.0390\pm 0.0295)$ | 0.999                       |
| 7-QTP           | $y=(0.0346\pm 0.0014)x+(0.0619\pm 0.0299)$ | 0.999                       |
| Inter-day (n=5) |                                            |                             |
| QTP             | $y=(0.0352\pm 0.0040)x+(0.0355\pm 0.0367)$ | 0.999                       |
| NorQTP          | $y=(0.0514\pm 0.0039)x+(0.0349\pm 0.0268)$ | 0.999                       |
| 7-QTP           | $y=(0.0357\pm 0.0022)x+(0.0443\pm 0.0340)$ | 0.999                       |
